# Supplementary material
Source: Springer Nature journal article supplement (https://www.springermedizin.de/resource/supplementary/12891_2010_1165_MOESM5_ESM.pdf/9507214)

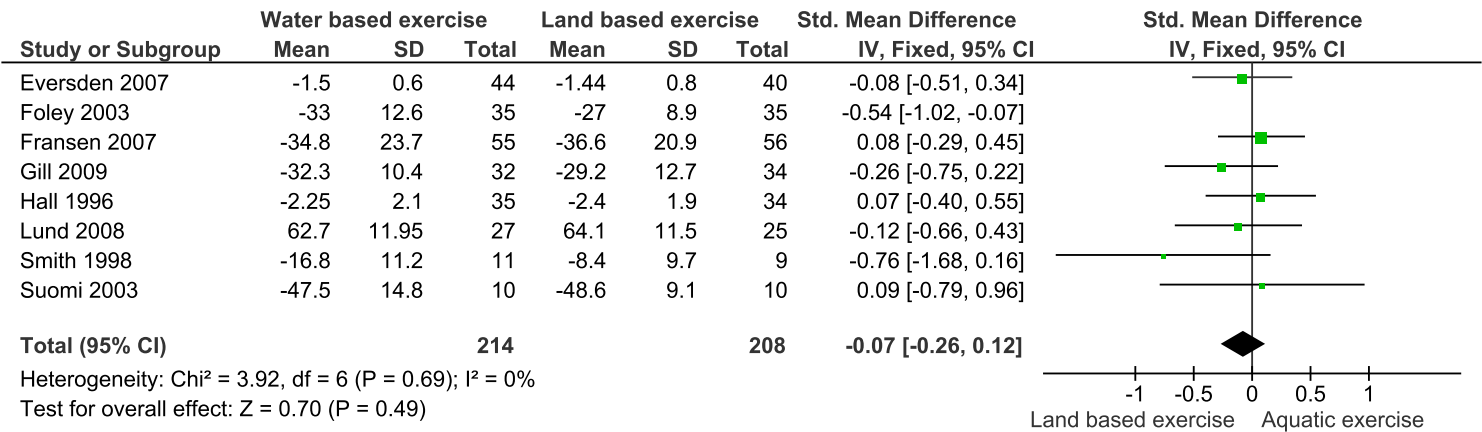

Supplement: MOESM5 [file 9507214]
